# Supplementary material for: Electroactive biomimetic collagen-silver nanowire composite scaffolds
Source: Royal Society of Chemistry journal article supplement (doi:10.1039/c6nr02027e), 2016-01-01
Supplement: c6nr02027e1.pdf [file c6nr02027e1.pdf]

## Electronic Supporting Information

### Electroactive Biomimetic Collagen-Silver Nanowire Composite Scaffolds

*Abeni Wickham<sup>a</sup>, Mikhail Vagin<sup>b</sup>, Hazem Khalaf<sup>f</sup>, Sergio Bertazzo<sup>d</sup>, Peter Hodder<sup>e</sup>, Staffan Dänmark<sup>a</sup>, Torbjörn Bengtsson<sup>c</sup>, Jordi Altimiras<sup>f</sup>, Daniel Aili<sup>a,\*</sup>*

<sup>a</sup>Division of Molecular Physics, Department of Physics, Chemistry and Biology (IFM), Linköping University, SE-581 83 Linköping, Sweden. <sup>b</sup>Division of Chemical and Optical Sensor Systems, Department of Physics, Chemistry and Biology (IFM), Linköping University, SE-581 83 Linköping, Sweden. <sup>c</sup>Faculty of Medicine and Health, School of Health and Medical Sciences, Örebro University, SE-701 82 Örebro, Sweden. <sup>d</sup>TA Instruments Ltd. 730-740 Centennial Court, Centennial Way, Elstree WD6 3SZ, UK, <sup>e</sup>Department of Materials, Imperial College London, London SW7 2AZ, UK. <sup>f</sup>Division of Biology, Department of Physics, Chemistry and Biology (IFM), Linköping University, SE-581 83 Linköping, Sweden.

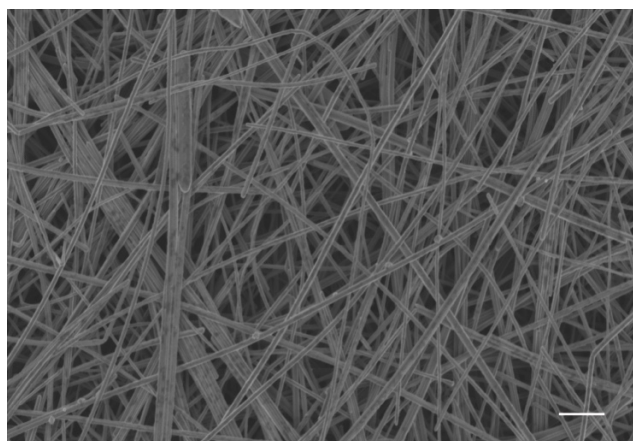

**Fig. S1** Scanning electron micrograph of silver nanowires (AgNWs) deposited on a solid support from a suspension with a concentration of 10 mg/ml AgNWs in water. Scale bar: 1  $\mu\text{m}$ .

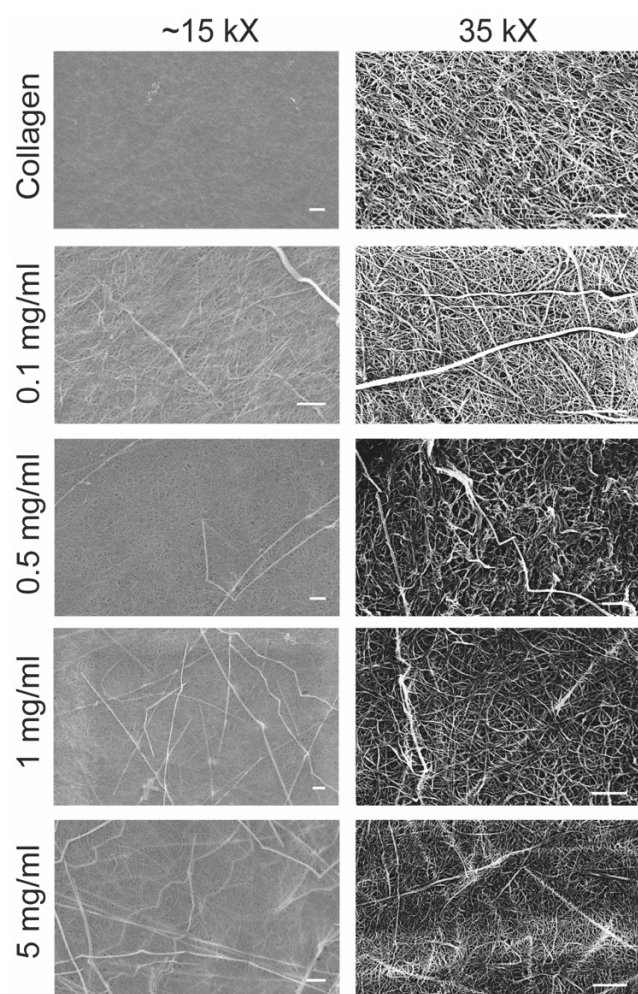

**Fig. S2** Scanning electron micrographs of collagen control (0 mg/mL AgNWs) and collagen/AgNW nanocomposites with increasing concentrations of AgNWs. Scale bars: 1  $\mu\text{m}$ .

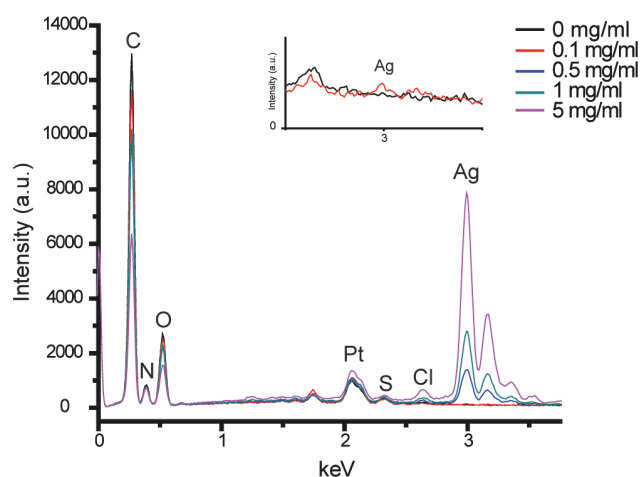

**Fig. S3** Elemental spectral analysis of collagen/AgNW nanocomposites, a) EDS of all samples where the higher concentrations between 0.5-5 mg/ml have large increases in the silver content, b) spectra of control and 0.1 mg/ml showing the increase in silver content.

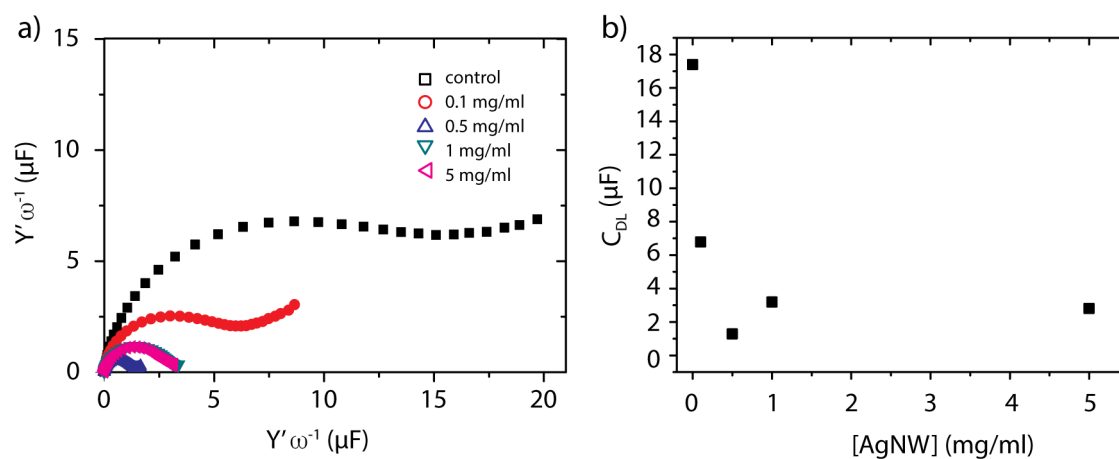

**Fig. S4** a) Impedance spectra in complex capacitive coordinates acquired in PBS at 0.6 V on screen-printed graphite disk electrodes modified with the nanocomposites. b) Dependence of double layer capacitance on the nanocomposite AgNW concentration.

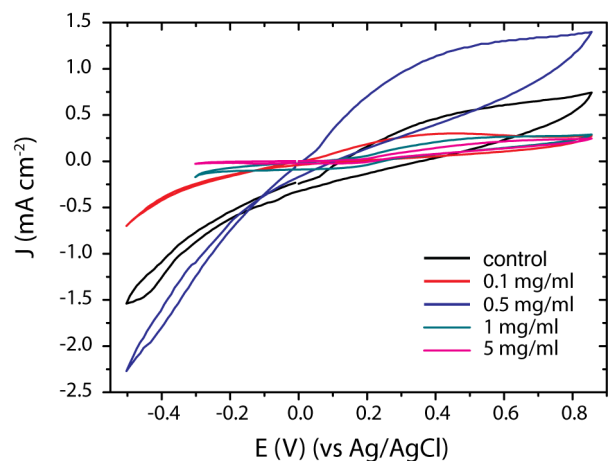

**Fig. S5** Cyclic voltammetry of collagen/AgNW nanocomposites recorded with a scan rate 50 mV/s in PBS of the pure collagen meshes, control (0 mg/mL AgNWs) (black curve), and nanocomposites with 0.1 mg/ml (red curve), and 0.5 mg/ml AgNW, (blue curve), 1 mg/ml (green curve), 5 mg/ml (pink curve).

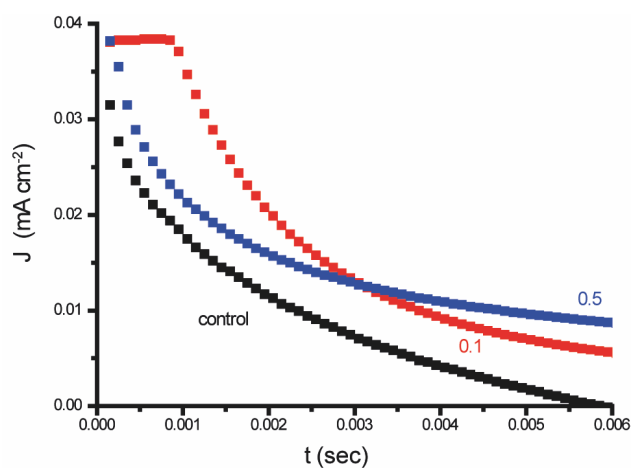

**Fig. S6** Linear scale of transient current densities of pure collagen meshes (0 mg/mL AgNWs), and nanocomposites with 0.1 and 0.5 mg/ml AgNWs, obtained using a 0.6 V pulse.

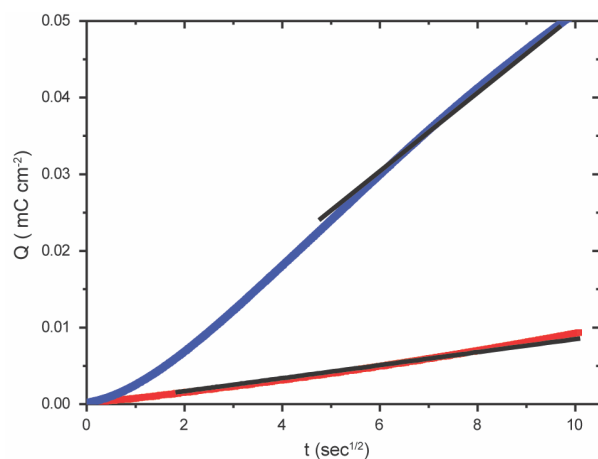

**Fig. S7** Anson plot of chronocoulometry data of collagen/AgNW nanocomposites with 0.1 mg/ml (■) and 0.5 mg/ml (■) AgNWs. Solid black lines illustrate the fitted data.

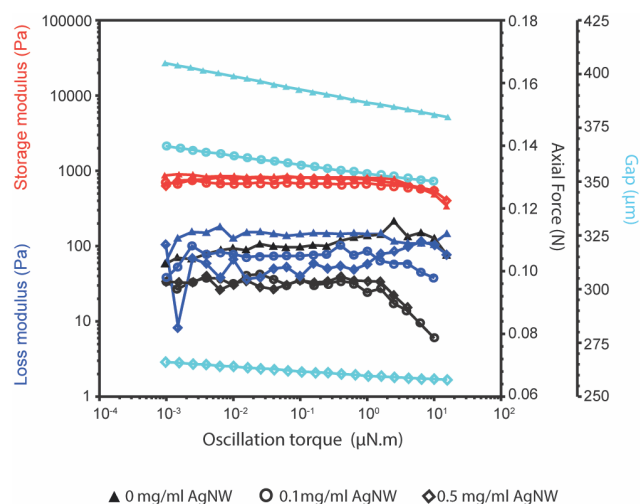

**Fig. S8** Amplitude sweep showing experimental constraints used to attain correct data. A small loading was used to keep the material in constant non-compressive contact with the geometry. Since there were no changes in the  $G'$  these small forces had no effect on the data collected.

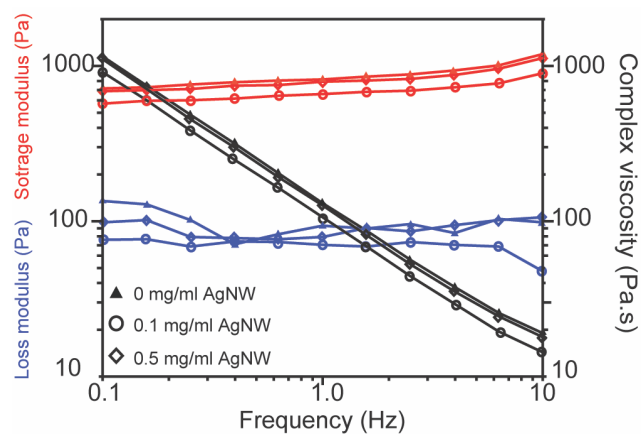

**Fig. S9** Frequency sweep on collagen/AgNW nanocomposites. All materials showed frequency independence.

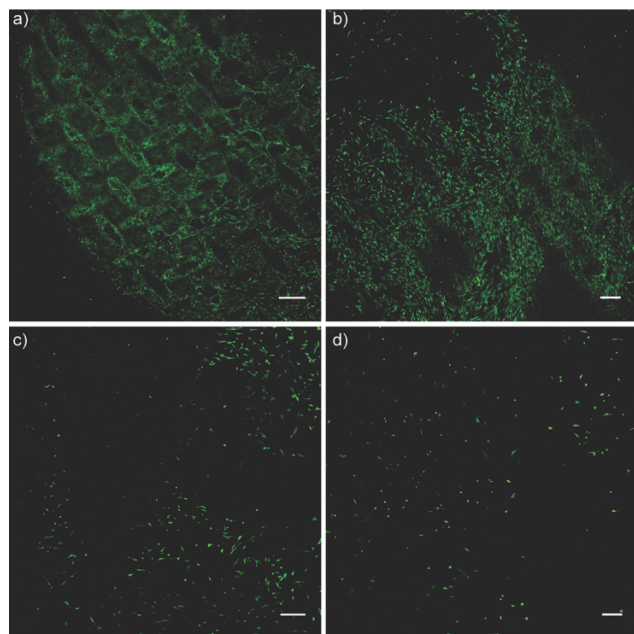

**Fig. S10** Live/Dead tiled images of ECCM on collagen/AgNW at day 7 on, a) control (0 mg/ml), b) 0.1 mg/ml, c) 0.5 mg/ml, d) 1 mg/ml. Scale bars: 200 μm

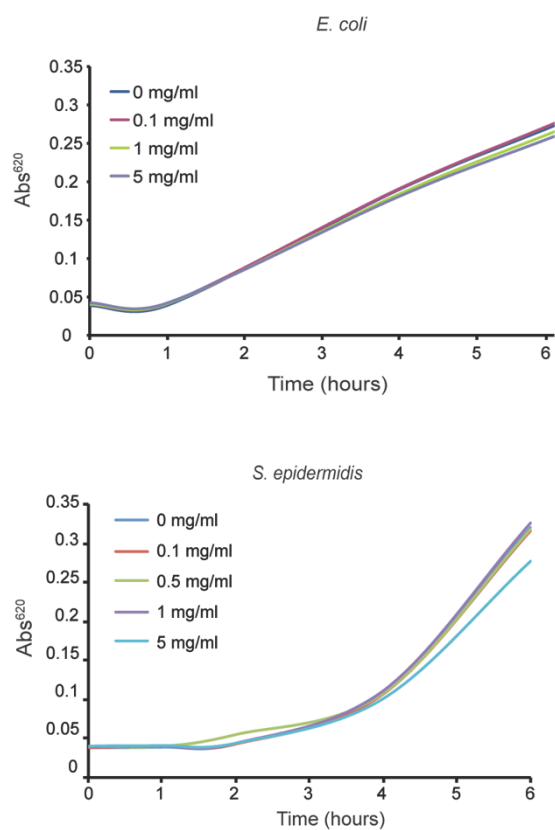

**Fig. S11** Collagen and collagen/AgNW nanocomposites cultured in microbial broth of *E.coli* and *S. epidermidis*. There was no significant difference in inhibition of bacterial activity in the broth after 6 hours.
